# Supplementary material for: Tuberculosis Biomarker Extraction and Isothermal Amplification in an Integrated Diagnostic Device
Source: PLOS journal article supplement (doi:10.1371/journal.pone.0130260), 2015-07-01
Supplement: S1 (10.1371/journal.pone.0130260.s001) [file journal.pone.0130260.s001]

# Tubing Movement Map

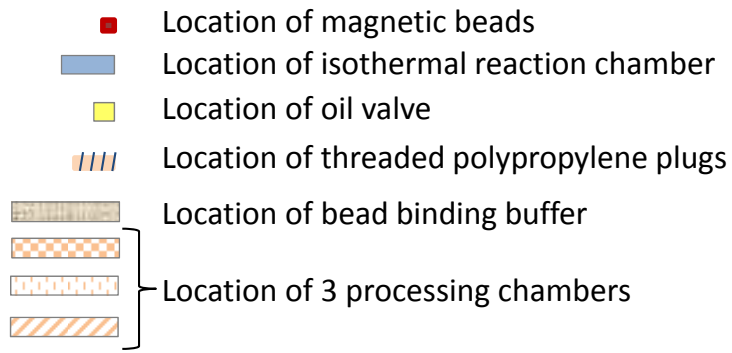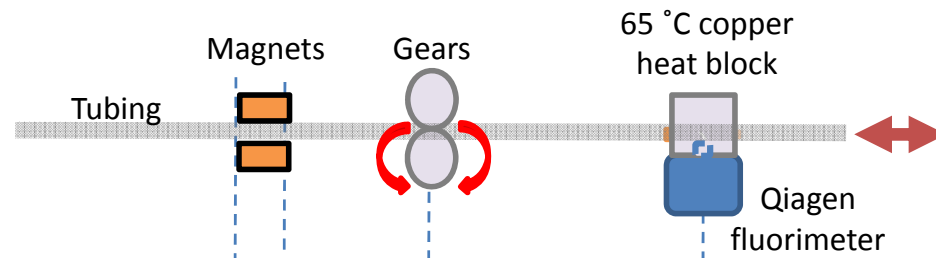

tube starting position

**P1**

start collecting beads from binding solution

**P2**

beads delivered to 1st processing chamber

**P3**

beads allowed to disperse

**P4**

start recollection from 1<sup>st</sup> processing chamber

**P5**

beads to 2nd processing chamber

**P6**

beads allowed to disperse

**P7**

start recollection

**P8**

**P9**

beads to 3rd processing chamber

**P10**

beads allowed to disperse

**P11**

start recollection

**P12**

biomarkers delivered to isothermal reaction chamber

**P13**

moved up to allow beads to disperse

beads removed from reaction chamber  
tubing realigned with fluorescence reader

**P14**

run isothermal reaction
